# Supplementary material
Source: PubMed Central journal article supplement (PMC6030506)
Supplement: NIHMS968597-supplement-Supporting_Information.pdf [file NIHMS968597-supplement-Supporting_Information.pdf]

*--- SUPPORTING INFORMATION ---*

## **Entropy as a Driver of Selectivity for Inhibitor Binding to Histone**

### **Deacetylase 6**

Nicholas J. Porter,<sup>1</sup> Florence F. Wagner<sup>2</sup>, and David W. Christianson<sup>1,\*</sup>

<sup>1</sup>Roy and Diana Vagelos Laboratories, Department of Chemistry, University of Pennsylvania,  
231 South 34th Street, Philadelphia, PA 19104-6323, United States

<sup>2</sup>Stanley Center for Psychiatric Research, Broad Institute of the Massachusetts Institute of  
Technology and Harvard University, 75 Ames Street, Cambridge, Massachusetts 02142, United  
States

\*author to whom correspondence should be sent: E-mail [chris@sas.upenn.edu](mailto:chris@sas.upenn.edu)

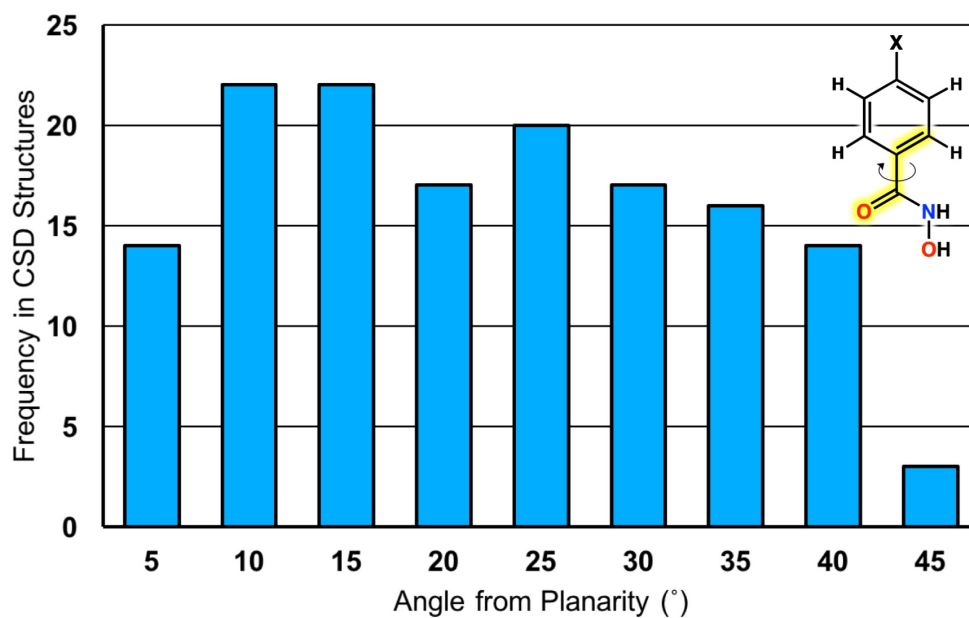

**Figure S1.** Deviations from planarity observed in conjugated aromatic hydroxamic acids. A total of 145 independent examples were found in 87 structures retrieved from the Cambridge Structural Database. The search query is shown as an inset structure and the angle measured is highlighted in yellow.

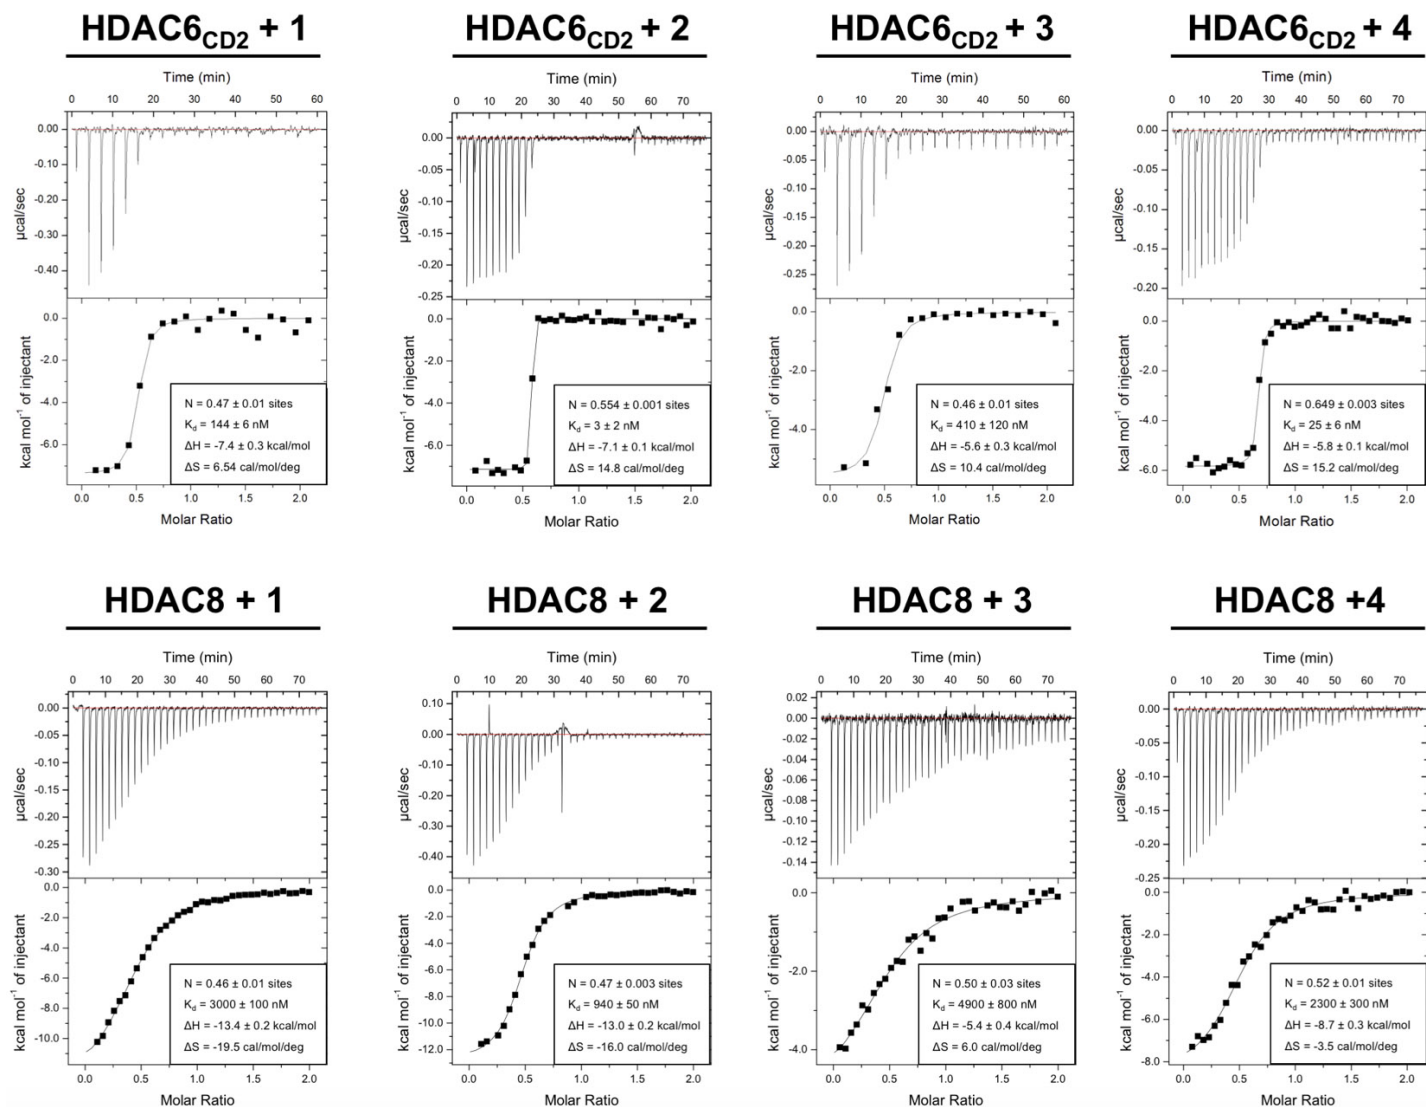

**Figure S2.** Isothermal titration calorimetry (ITC) thermograms for the binding of compounds 1, 2, 3, and 4 to HDAC6 and HDAC8.

### HDAC6<sub>CD2</sub> + SAHA

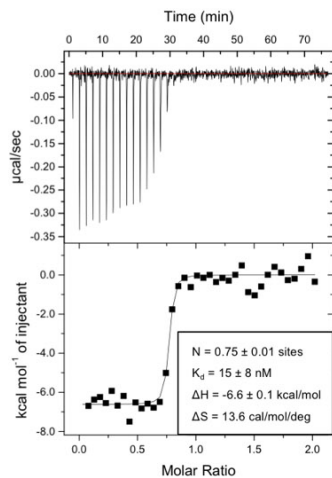

### HDAC6<sub>CD2</sub> + R'stat

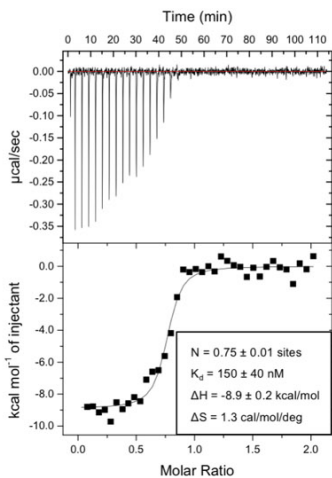

### HDAC6<sub>CD2</sub> + HPB

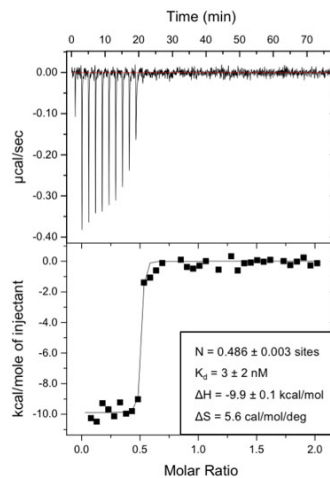

### HDAC8 + SAHA

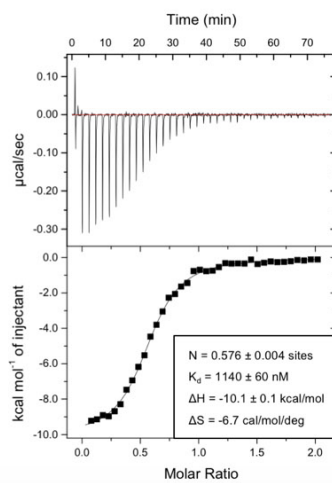

### HDAC8 + R'stat

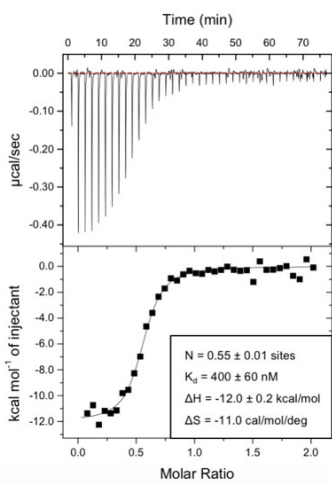

### HDAC8 + HPB

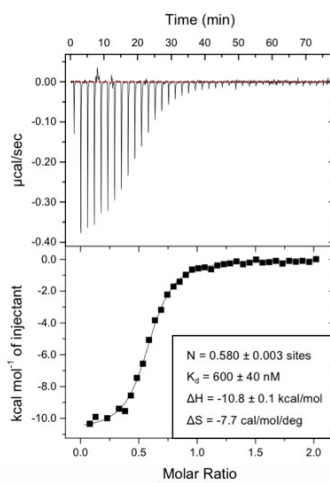

**Figure S3.** Isothermal titration calorimetry (ITC) thermograms for the binding of **SAHA**, Ricolinostat (**R'stat**), and **HPB** to HDAC6 and HDAC8.
